CELL SCIENCE AT A GLANCE

# Membrane insertases at a glance

Büsra Kizmaz and Johannes M. Herrmann\*

**ABSTRACT**

Protein translocases, such as the bacterial SecY complex, the Sec61 complex of the endoplasmic reticulum (ER) and the mitochondrial translocases, facilitate the transport of proteins across membranes. In addition, they catalyze the insertion of integral membrane proteins into the lipid bilayer. Several membrane insertases cooperate with these translocases, thereby promoting the topogenesis, folding and assembly of membrane proteins. Oxa1 and BamA family members serve as core components in the two major classes of membrane insertases. They facilitate the integration of proteins with  $\alpha$ -helical transmembrane domains and of  $\beta$ -barrel proteins into lipid bilayers, respectively. Members of the Oxa1 family were initially found in the internal membranes of bacteria, mitochondria and chloroplasts. Recent studies, however, also identified several Oxa1-type insertases in the ER, where they serve as catalytically active core

subunits in the ER membrane protein complex (EMC), the guided entry of tail-anchored (GET) and the GET- and EMC-like (GEL) complex. The outer membrane of bacteria, mitochondria and chloroplasts contain  $\beta$ -barrel proteins, which are inserted by members of the BamA family. In this Cell Science at a Glance article and the accompanying poster, we provide an overview of these different types of membrane insertases and discuss their function.

**KEY WORDS:** BAM complex,  $\beta$ -barrel proteins, EMC complex, GET complex, Membrane insertases, Oxa1, Protein biogenesis, Translocases, YidC

**Introduction**

Integral membrane proteins make up about one third of all cellular proteins. They can span the membrane with one  $\alpha$ -helical transmembrane domain close to the N terminus of a protein (referred to as a signal anchor), on the C-terminus (referred to as a tail anchor) or somewhere in the middle of a protein. Polytopic membrane proteins have either several  $\alpha$ -helical transmembrane domains or a series of membrane-embedded  $\beta$ -strands. The outer

Cell Biology, University of Kaiserslautern, Kaiserslautern 67663, Germany.

\*Author for correspondence (hannes.herrmann@biologie.uni-kl.de)

DOI: 10.1242/jcs.261219

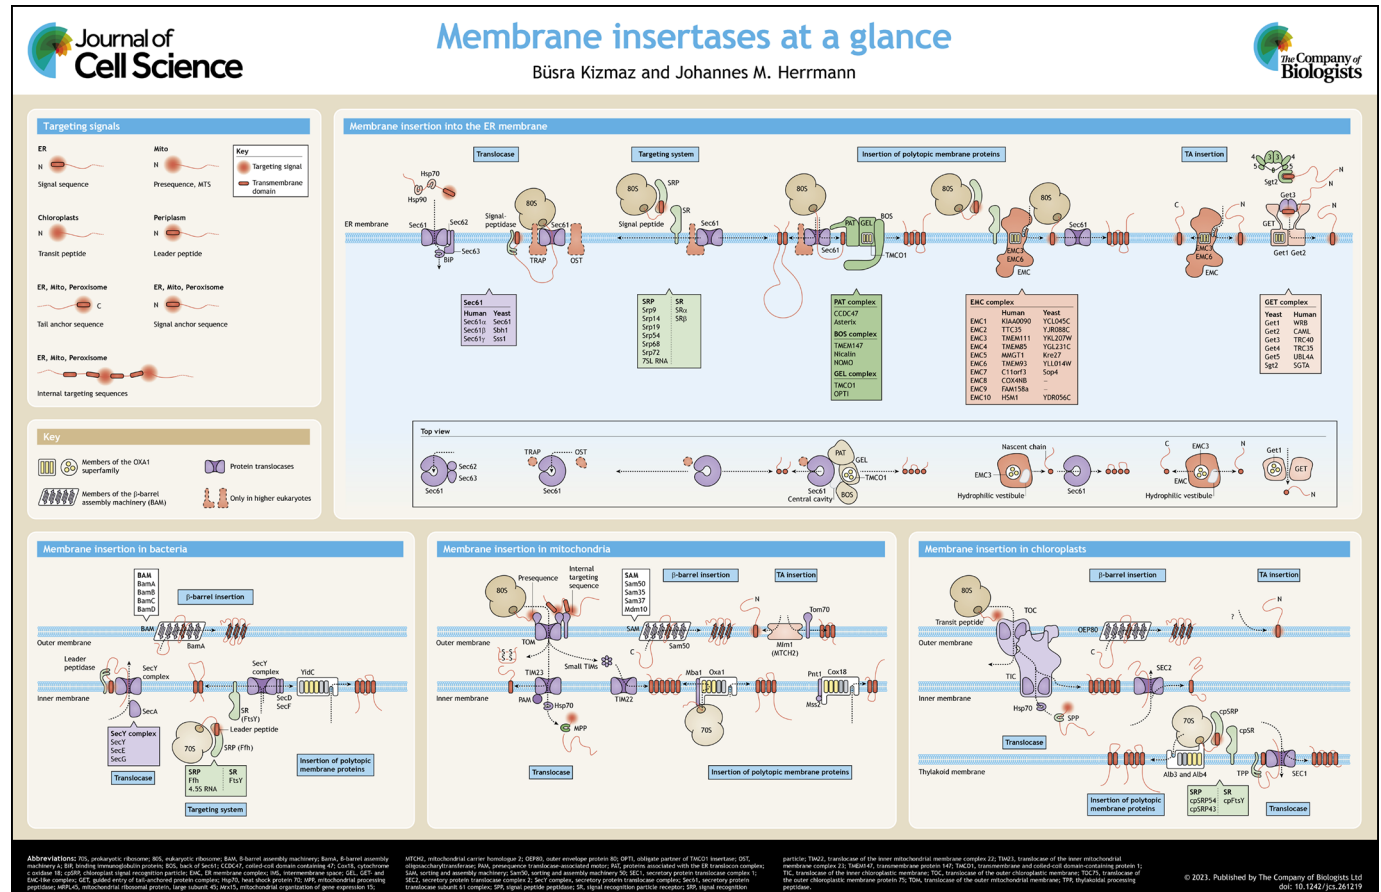

membranes of bacteria, mitochondria and plastids contain this second type of integral membrane protein, also called  $\beta$ -barrel proteins. These pore-forming proteins comprise eight (such as in the abundant OmpA porin of *Escherichia coli*) to 26  $\beta$ -strands, in which the most N-terminal strand is bound to the most C-terminal one to form a cylindrical structure around a central hydrophilic pore (Doyle and Bernstein, 2022). The residues that form these sheets alternately consist of hydrophobic residues (facing the lipid bilayer of the membrane) and polar residues (facing the interior of the cylinder). The machineries which promote the insertion of integral membrane proteins with  $\alpha$ -helical transmembrane domains as well as of  $\beta$ -barrel proteins are introduced in this short review and illustrated on the accompanying poster.

### Translocases and insertases facilitate membrane protein biogenesis

Translocases and insertases are proteins that assist in the membrane insertion of integral membrane proteins. Translocases allow the complete translocation (secretion) of proteins across the lipid bilayer whereas insertases mediate the insertion of hydrophobic protein segments into the membrane. Some translocases form water-filled protein-conducting channels, whereas others allow protein translocation through protein–lipid interfaces in destabilized membranes (Wu and Rapoport, 2021). Given that hydrophilic proteins are unable to penetrate membranes on their own, translocases, such as the SecY complex, the Sec61 complex and the translocases of the outer and inner membrane of mitochondria are essential for protein translocation and, thus, for the viability of organisms.

Insertion into the membrane often occurs spontaneously *in vitro* even when no helping insertases are present (Kiefer and Kuhn, 1999), but *in vivo*, such factors are important to increase insertion rates and to provide target membrane specificity. Thus, insertases are comparable to enzymes that catalyze an exergonic reaction. Most insertases for  $\alpha$ -helical transmembrane domains are not essential, and their deletion causes rather moderate defects. This might explain why many insertases, such as the proteins of the guided entry of tail-anchored proteins (GET complex), the ER membrane complex (EMC) or the GET- and EMC-like (GEL) complex have been identified only recently (Schuldiner et al., 2008; Guna et al. 2018; McGilvray et al., 2020).

Membrane insertion as well as membrane translocation often occurs during protein synthesis. This co-translational mode is typically facilitated by a signal recognition particle (SRP), which recognizes targeting sequences in nascent chains and directs ribosome–nascent chain complexes to insertases or translocases in target membranes (Akopian et al., 2013). Post-translational targeting does not make use of SRPs.

### Protein insertion into the inner membrane of bacteria

The bacteria SecY complex serves as a protein translocase for the secretion of soluble proteins, as well as for the lateral integration of integral membrane proteins (see poster). The SecY complex is a trimeric complex (consisting of SecY, SecE and SecG), which forms an hourglass-shaped translocation pore with a lateral gate on one side of its wall (Van den Berg et al., 2004), which dynamically flickers between its closed and open state to allow the release of transmembrane segments into the lipid bilayer (Mercier et al., 2021). Opening of the lateral gate is stimulated by the hydrophobicity of the membrane segment in a penetrating substrate, as well as by protein ligands of the SecY complex, such as the integral membrane protein YidC (Mercier et al., 2021;

Sachelaru et al., 2013). Post-translational translocation through the SecY complex is driven by SecA, which pushes proteins across the membrane in an ATP-consuming reaction (Kedrov et al., 2011) (see poster). Co-translational translocation is facilitated by the bacterial SRP (consisting of the protein Ffh and its associated 4.5S RNA co-factor) and its cognate receptor FtsY (Miller et al., 1994).

YidC serves as insertase, which receives substrates from the SecY complex to promote their further topogenesis and folding. The SecY-associated membrane proteins SecD and SecF, together with YidC, form a lipid-filled chamber that has been suggested to serve as folding compartment for nascent membrane proteins (Botte et al., 2016). The SecY complex and YidC are ubiquitously found in prokaryotes, whereas SecD and SecF, are not strictly conserved. Membrane proteins lacking larger periplasmic domains can also be inserted by YidC in a SecY-independent fashion (Serek et al., 2004). The YidC protein of *E. coli* comprises six transmembrane domains, five of which form a positively charged hydrophilic groove within the membrane plane (Kumazaki et al., 2014; Wickles et al., 2014; Chen et al., 2017). Membrane thinning, the disturbance of tightly packed membrane lipids and negative charges in the translocated segments promote the insertion and intramitochondrial folding of inner membrane proteins; this allows proteins to reach their correct topology in the lipid bilayer, a process referred to as topogenesis (Endo et al., 2022; McDowell et al., 2021; Komar et al., 2016). Given that YidC facilitates protein folding and the assembly of oligomeric proteins (e.g. of the *c* ring of the  $F_0$  part of the ATPase), its role is comparable to that of chaperones for water-soluble proteins.

### Membrane insertion into the inner membrane of mitochondria

Mitochondria and chloroplasts were derived from bacteria and still contain genomes for the synthesis of a small number of proteins. Mitochondria reduced the coding information of their genome to a minimum, and mitochondrial ribosomes of animals and fungi only synthesize a small number of highly hydrophobic membrane proteins. Membrane insertion of mitochondrial translation products is facilitated by the mitochondrial YidC homolog Oxa1 (called OXA1L in animals; for a review, see Homberg et al., 2023). Oxa1 was the first representative of the Oxa1 family discovered (therefore coining the family name) and received its name for its critical relevance for cytochrome oxidase assembly (Bonney et al., 1994; Bauer et al., 1994). Oxa1 shares the five groove-forming transmembrane domains with YidC and presumably promotes the insertion and assembly of its substrates in a YidC-like fashion. Mitochondria of most eukaryotes do not contain an SRP system but rather directly connect the ribosome to the inner membrane (Szyrach et al., 2003; Jia et al., 2003). A C-terminal coiled-coil domain of Oxa1 serves as a ribosome anchor, which binds close to the tunnel exit of the ribosomal large subunit and tethers it to the site of membrane insertion (Pfeffer et al., 2015; Itoh et al., 2021). The membrane-associated protein Mba1 (called MRPL45 in animals) further bridges the gap from the exit tunnel to the membrane-embedded region of Oxa1 and supports protein insertion into the inner membrane together with Mrx15 and Mdm38 (Ott et al., 2006; Moller-Hergt et al., 2018; Wenger et al., 2023; Lorenzi et al., 2016) (see poster).

Mitochondrially encoded inner membrane proteins of animals and fungi have lost any larger domains exposed to the intramembrane space (IMS), making a SecY-analog dispensable, with one exception – the C-terminus of Cox2 forms a large, highly negatively charged

domain essential for cytochrome oxidase function. Translocation of this domain depends on a specific Oxa1 paralog, called Cox18 and its complex partners Pnt1 and Mss2 (Bourens and Barrientos, 2017; Saracco and Fox, 2002). The mechanism, by which the Cox18 complex mediates the export of the Cox2 C-terminal tail is still unresolved.

Some nuclear encoded proteins also use Oxa1 for their insertion into the inner membrane. However, most of these proteins are inserted following a stop-transfer mechanism by the translocases of the inner membrane, the TIM23 and TIM22 complexes. The composition and function of the mitochondrial import machinery have been described in depth in excellent previous reviews, to which we refer the reader to for further details (Chacinska et al., 2009; Horten et al., 2020).

### Membrane insertion of mitochondrial tail-anchored proteins

Many proteins of the mitochondrial outer membrane are tethered to the mitochondrial surface by a C-terminal tail-anchor. In yeast, these proteins are inserted into the membrane by an oligomer of the single-spanning protein Mim1 (Becker et al., 2011; Papic et al., 2011). In human mitochondria, the polytopic outer membrane protein MTCH2 plays an analogous role as tail anchor insertase (Guna et al., 2022). However, the mechanisms by which the Mim1 complex and MTCH2 facilitate membrane insertion are not known. Comparable insertases for tail-anchored proteins presumably also exist on chloroplasts but have not been described to date.

### Membrane insertion into the thylakoid membrane of chloroplasts

The thylakoid membrane of chloroplasts is characterized by an extremely high protein content. The chloroplast genome still encodes several proteins that are secreted into the thylakoid lumen, as well as to the IMS. Their translocation closely resembles the translocation process at the bacterial inner membrane as these proteins can carry N-terminal leader peptides, employ an SRP system for targeting and are transported through SecY-like translocases. However, chloroplasts show several deviations from the bacterial system (see poster).

There are two distinct Sec complexes (SEC1 and SEC2) to direct proteins to the thylakoid lumen or the IMS, respectively (Li et al., 2017), consisting of distinct SecY, SecE and SecA subunits; there is no SecG in plastids of higher plants.

The SRP protein (cpSRP54) in plastids lacks an RNA component but is supported by the additional plant-specific co-factor cpSRP43; cpSRP43 promotes protein targeting in conjunction with cpSRP54, but it also acts independently as a chaperone to protect chlorophyll biosynthesis proteins against high temperature (Jaru-Ampornpan et al., 2010; Ji et al., 2021; Horn et al., 2015). The SRP system in plants cooperates with the YidC homologs of plastids, Alb3 and Alb4, which serve as membrane insertases for a large spectrum of thylakoid proteins. The nuclear-encoded light-harvesting-complex proteins (LHCPs) represent the predominant substrates of Alb3 (Bals et al., 2010; Rathod et al., 2022).

### Membrane insertion into the ER membrane

The ER is the professional compartment for the synthesis and sorting of secretory and membrane proteins. Owing to the predominantly co-translational mode of protein biogenesis on the ER membrane, the ER surface is covered with cytosolic ribosomes. N-terminal signal sequences and internal transmembrane domains in nascent chains serve as targeting information, which is decoded by the eukaryotic SRP (Akopian et al., 2013), a large ribonucleoprotein complex consisting of six proteins, Srp9, Srp14, Srp19, Srp54, Srp68 and

Srp72, and the 7SL RNA. The SRP recruits the ribosome–nascent chain complex to the ER-tethered heterodimeric SRP receptor. Srp54 and the  $\alpha$ -subunit of the SRP receptor (SRPRA) are GTPases; in a nucleotide-controlled, timer-like mechanism, they control the release of the ribosome from the SRP and the transfer of the ribosome to the Sec61 complex (Wild et al., 2019; Miller et al., 1993; Wild et al., 2001) (see poster). Additional targeting components, including the yeast proteins Snd1, Snd2 and Snd3 (for SRP-independent targeting), help to recruit nascent chains to the Sec61 complex, particularly if the hydrophobicity of their signal sequence is too low for efficient SRP binding (Aviram et al., 2016; Tirincci et al., 2022).

The Sec61 complex is a heterotrimeric protein that shows high similarity to the bacterial SecY complex. This Sec61 complex represents the entry gate for proteins that are translocated into the ER lumen and inserts membrane proteins via its lateral gate into the ER membrane. In mammalian cells, the translocation into the ER occurs predominantly co-translationally and the SRP promotes a direct binding of the ribosome to the Sec61 complex (Becker et al., 2009). Most secretory proteins in yeast cells and some in mammalian cells are translocated into the ER post-translationally. In that case, Sec62 and Sec63 associate with the Sec61 translocon and drive the translocation reaction in conjunction with the luminal Hsp70 protein BiP (also known as HSPA5; Kar2 in yeast) (Schlenstedt et al., 1990; Brodsky et al., 1993).

The Sec61-mediated protein translocation and the role of associated enzymes such as the oligosaccharide transferase (OST) complex and the signal peptidase are already well described in excellent reviews (Rapoport et al., 2017; Voorhees and Hegde, 2016). However, more recent studies have identified several other insertases in the ER membrane that collaborate with or complement the function of the Sec61 complex – the GET complex, the EMC complex and the TMC01-containing GEL complex, each containing a specialized member of the Oxa1 family as one of their core components (Anghel et al., 2017) (see poster).

The GET complex was initially identified in yeast (Schuldiner et al., 2008) but is ubiquitously present in eukaryotes. A heterodimer of Get1 (also known as WRB in humans) together with Get2 (CAML in humans, and also known as CAMLG) facilitates the insertion of tail-anchor proteins into the ER (McDowell et al., 2020; Wang et al., 2014; Schuldiner et al., 2008) (see poster). Protein targeting (which for tail-anchor proteins is always a post-translational event) is mediated by several cytosolic proteins, such as Sgt2 (SGTA), Get5 (UBL4A), Get4 (also known as TRC35) and Get3 (also known as TRC40) (Zhang et al., 2021). Get3 is an ATP-binding protein that delivers tail-anchored proteins to the Get1–Get2 insertase module to support their membrane insertion (Mariappan et al., 2011; Stefer et al., 2011; Fry et al., 2022). Get3 also serves as chaperone independently of its role in tail-anchor insertion (Ulrich et al., 2022; Powis et al., 2013).

The EMC was likewise first identified in yeast (Jonikas et al., 2009) but also found in other eukaryotes. It consists of 10 subunits in humans, seven of which are embedded into the ER membrane (Pleiner et al., 2020) (see poster). The EMC of yeast is highly similar but comprises only eight subunits (Bai et al., 2020; Miller-Vedam et al., 2020). The Oxa1 homolog Emc3, together with Emc6, comprises the catalytic core of the EMC by forming a hydrophilic vestibule with critical positively charged residues on its surface. These were proposed to facilitate protein insertion into a locally thinned and disorganized membrane, and thus appear to apply the same catalytic mechanism used by the much simpler monomeric Oxa1 family members (Pleiner et al., 2020). A fusion of Emc3 and Emc6 that was artificially targeted to the mitochondrial inner

membrane even suppresses the defects of Oxa1-deficient yeast mutants, supporting the generally conserved mode of function of the different Oxa1 members in membrane protein insertion (Güngör et al., 2022). The EMC promotes the insertion of two types of membrane proteins (O’Keefe et al., 2021; Tian et al., 2019; Chitwood et al., 2018; Guna et al., 2018). First, it inserts the first transmembrane domains of some multi-pass membrane proteins; and second, many tail or signal-anchored ER proteins are inserted by the EMC complex, often in cooperation with the Sec61 translocon (Wu and Hegde, 2023).

A third ER membrane insertion complex was described only recently and is absent from yeast and only found in animals – the GEL complex contains the Oxa1 homolog TMCO1, which was proposed to serve as an insertase for multi-pass proteins (McGilvray et al., 2020) and a further subunit called OPTI (also known as RAB5IF). This GEL complex was found to bind two further protein complexes, BOS (for back of the translocase; consisting of nicalin, TMEM147 and NOMO) (Dettmer et al., 2010; McGilvray et al., 2020) and PAT [formed by CCDC47 and asterix (also known as WDR83OS)] (Sundaram et al., 2022; Chitwood and Hegde, 2020). This Sec61–BOS–GEL–PAT supercomplex was proposed to serve as a specialized translocon for multi-pass proteins, utilizing a lipid-filled central cavity for intra-membrane folding of its substrates, reminiscent to the SecY–YidC–SecD–SecE complex of the bacterial inner membrane (Botte et al., 2016; Smalinskaite et al., 2022). However, the mechanistic properties of this supercomplex are still poorly understood.

In higher eukaryotes, secretory proteins make use of another isoform of the Sec61 translocon, in which Sec61 is bound to the OST complex that also occupies the ‘back’ of Sec61 and thus competes with the insertion modules for its position on the translocase (Sundaram et al., 2022; Gemmer et al., 2023). The translocon-associated protein (TRAP) complex represents another Sec61-bound subcomplex of the ER translocon.

In summary, the ER membrane contains at least three functionally distinct membrane insertases, which all employ Oxa1 homologs as catalytically active core subunits. These three complexes evolved presumably from an archaeal Oxa1 homolog, which, like Get1, Emc3 and TMCO1, contain three transmembrane domains (Borowska et al., 2015). Moreover, unlike the bacterial and organellar Oxa1 family members, the ER isoforms function as part of multi-subunit complexes, which apart from acting as insertases have further roles in membrane protein biogenesis.

### Membrane insertion of $\beta$ -barrel proteins

$\beta$ -barrel proteins are exclusively found in outer membranes of bacteria and bacteria-derived organelles. The membrane integration of  $\beta$ -barrel proteins is conceptually very different from that of proteins with  $\alpha$ -helical transmembrane domains. For  $\beta$ -barrel proteins, a mature cylindrical architecture is a prerequisite for their membrane incorporation. In bacteria, their insertion is mediated by a specialized  $\beta$ -barrel protein that is part of the so-called  $\beta$ -barrel assembly machine (BAM) (see poster). BamA is a crucial central player of the BAM complex (Bakelar et al., 2016; Noinaj et al., 2013). BamA itself is a  $\beta$ -barrel protein and has the ability to open its cylindrical structure between its first and last  $\beta$ -strand (Doyle and Bernstein, 2021; Hohn et al., 2018). This allows the accommodation of  $\beta$ -hairpins of its substrates, which are integrated into the lipid bilayer in a stepwise manner (Tomasek et al., 2020).

The sorting and assembly machinery (SAM) of mitochondria works in a comparable fashion. Here, its central  $\beta$ -barrel protein

Sam50 (SAMM50 in animals) integrates its substrates into the membrane and facilitates their assembly with assistance of several other subunits of the SAM complex (Takeda et al., 2021, 2023). Substrate release from SAM is triggered by another  $\beta$ -barrel protein, Mdm10, which replaces the substrate from Sam50 once it is fully integrated into the inner membrane (Meisinger et al., 2004).

Chloroplasts insert  $\beta$ -barrel proteins via their general protein translocase of the outer membrane of the TOC complex, and OEP805, which is related to BamA and Sam50 (Day et al., 2019). Molecular details of the  $\beta$ -barrel integration process in plastids are not known. However, the architecture of the chloroplast import machinery has been recently revealed by cryo-electron microscopy, showing the presence of several embedded  $\beta$ -barrel proteins (Jin et al., 2022; Liu et al., 2023). These structural insights will be a good basis to study the mechanistic details of  $\beta$ -barrel protein insertion in chloroplasts in the future.

### Final remarks

The Sec complex, as well as the translocases of mitochondria and chloroplasts, had already been discovered by the 80s and 90s. In contrast, membrane insertases, such as the GET, EMC and GEL complexes, have only been recently identified. Given that hundreds of membrane proteins are substrates of these complexes, including many of high clinical relevance, their molecular mode of action is a hot topic in the field.

In addition to these insertases, intracellular membranes also have extractors, complexes that can revert the insertion of proteins. These factors are crucial for proof-reading and for the removal of mis-localized proteins. Examples for such extractors are the Msp1 (ATAD1) AAA protein of the mitochondrial outer membrane (Wohlever et al., 2017; Okreglak and Walter, 2014; Chen et al., 2014; Wang et al., 2022), Spf1 (P5A-ATPase) of the ER (McKenna et al., 2022; McKenna et al., 2020) and the SP1 and SP2 proteins of the outer membrane of chloroplasts (Ling et al., 2021). It will be exciting to study the interplay of insertases with these extractor systems on a mechanistic level in the future. It appears likely that cycles of insertion and extraction reactions ensure the correct targeting of each given membrane protein to its specific intracellular membrane.

### Competing interests

The authors declare no competing of financial interests.

### Funding

The work in our groups is funded by the European Research Council (ERC 101052639 MitoCyto to J.M.H.), the Deutsche Forschungsgemeinschaft (HE2803/10-1 and GRK2737-STRESSistance to J.M.H.), and the Landesforschungsinitiative Rheinland-Pfalz BioComp (to J.M.H.).

### High-resolution poster

A high-resolution version of the poster is available for downloading at <https://journals.biologists.com/jcs/article-lookup/doi/10.1242/jcs.261219#supplementary-data>.

### References

- Akopian, D., Shen, K., Zhang, X. and Shan, S. O. (2013). Signal recognition particle: an essential protein-targeting machine. *Annu. Rev. Biochem.* **82**, 693–721. doi:10.1146/annurev-biochem-072711-164732
- Anghel, S. A., McGilvray, P. T., Hegde, R. S. and Keenan, R. J. (2017). Identification of oxa1 homologs operating in the eukaryotic endoplasmic reticulum. *Cell Rep* **21**, 3708–3716. doi:10.1016/j.celrep.2017.12.006
- Aviram, N., Ast, T., Costa, E. A., Arakel, E. C., Chuartzman, S. G., Jan, C. H., Hassdenteufel, S., Dudek, J., Jung, M., Schorr, S. et al. (2016). The SND proteins constitute an alternative targeting route to the endoplasmic reticulum. *Nature* **540**, 134–138. doi:10.1038/nature20169
- Bai, L., You, Q., Feng, X., Kovach, A. and Li, H. (2020). Structure of the ER membrane complex, a transmembrane-domain insertase. *Nature* **584**, 475–478. doi:10.1038/s41586-020-2389-3

- Bakelar, J., Buchanan, S. K. and Noinaj, N.** (2016). The structure of the beta-barrel assembly machinery complex. *Science* **351**, 180-186. doi:10.1126/science.aad3460
- Bals, T., Dunschede, B., Funke, S. and Schunemann, D.** (2010). Interplay between the cpSRP pathway components, the substrate LHCP and the translocase Alb3: an in vivo and in vitro study. *FEBS Lett.* **584**, 4138-4144. doi:10.1016/j.febslet.2010.08.053
- Bauer, M., Behrens, M., Esser, K., Michaelis, G. and Pratje, E.** (1994). *PET1402*, a nuclear gene required for proteolytic processing of cytochrome oxidase subunit 2 in yeast. *Mol. Gen. Genet.* **245**, 272-278. doi:10.1007/BF00290106
- Becker, T., Bhushan, S., Jarasch, A., Armache, J. P., Funes, S., Jossinet, F., Gumbart, J., Mielke, T., Berninghausen, O., Schulten, K. et al.** (2009). Structure of monomeric yeast and mammalian Sec61 complexes interacting with the translating ribosome. *Science* **326**, 1369-1373. doi:10.1126/science.1178535
- Becker, T., Wenz, L. S., Kruger, V., Lehmann, W., Muller, J. M., Goroncy, L., Zufall, N., Lithgow, T., Guiard, B., Chacinska, A. et al.** (2011). The mitochondrial import protein Mim1 promotes biogenesis of multispanning outer membrane proteins. *J. Cell Biol.* **194**, 387-395. doi:10.1083/jcb.201102044
- Bonnefoy, N., Chalvet, F., Hamel, P., Slominski, P. P. and Dujardin, G.** (1994). *OXA1*, a *Saccharomyces cerevisiae* nuclear gene whose sequence is conserved from prokaryotes to eukaryotes controls cytochrome oxidase biogenesis. *J. Mol. Biol.* **239**, 201-212. doi:10.1006/jmbi.1994.1363
- Borowska, M. T., Dominik, P. K., Anghel, S. A., Kossiakoff, A. A. and Keenan, R. J.** (2015). A YidC-like protein in the archaeal plasma membrane. *Structure* **23**, 1715-1724. doi:10.1016/j.str.2015.06.025
- Botte, M., Zaccari, N. R., Nijeholt, J. L., Martin, R., Knoops, K., Papai, G., Zou, J., Deniaud, A., Karuppasamy, M., Jiang, Q. et al.** (2016). A central cavity within the holo-translocon suggests a mechanism for membrane protein insertion. *Sci. Rep.* **6**, 38399. doi:10.1038/srep38399
- Bourens, M. and Barrientos, A.** (2017). Human mitochondrial cytochrome c oxidase assembly factor COX18 acts transiently as a membrane insertase within the subunit 2 maturation module. *J. Biol. Chem.* **292**, 7774-7783. doi:10.1074/jbc.M117.778514
- Brodsky, J. L., Hamamoto, S., Feldheim, D. and Schekman, R.** (1993). Reconstitution of protein translocation from solubilized yeast membranes reveals topologically distinct roles for BiP and cytosolic Hsc70. *J. Cell Biol.* **120**, 95-102. doi:10.1083/jcb.120.1.95
- Chacinska, A., Koehler, C. M., Milenkovic, D., Lithgow, T. and Pfanner, N.** (2009). Importing mitochondrial proteins: machineries and mechanisms. *Cell* **138**, 628-644. doi:10.1016/j.cell.2009.08.005
- Chen, Y., Capponi, S., Zhu, L., Gellenbeck, P., Freites, J. A., White, S. H. and Dalbey, R. E.** (2017). YidC insertase of *Escherichia coli*: water accessibility and membrane shaping. *Structure* **25**, 1403-1414.e3. doi:10.1016/j.str.2017.07.008
- Chen, Y. C., Umanah, G. K., Dephoure, N., Andrabi, S. A., Gygi, S. P., Dawson, T. M., Dawson, V. L. and Rutter, J.** (2014). Msp1/ATAD1 maintains mitochondrial function by facilitating the degradation of mislocalized tail-anchored proteins. *EMBO J.* **33**, 1548-1564. doi:10.15252/embj.201487943
- Chitwood, P. J. and Hegde, R. S.** (2020). An intramembrane chaperone complex facilitates membrane protein biogenesis. *Nature* **584**, 630-634. doi:10.1038/s41586-020-2624-y
- Chitwood, P. J., Juszkiwicz, S., Guna, A., Shao, S. and Hegde, R. S.** (2018). EMC is required to initiate accurate membrane protein topogenesis. *Cell* **175**, 1507-1519.e16. doi:10.1016/j.cell.2018.10.009
- Day, P. M., Inoue, K. and Theg, S. M.** (2019). Chloroplast outer membrane beta-barrel proteins use components of the general import apparatus. *Plant Cell* **31**, 1845-1855. doi:10.1105/tpc.19.00001
- Dettmer, U., Kuhn, P. H., Abou-Ajram, C., Lichtenthaler, S. F., Kruger, M., Kremmer, E., Haass, C. and Haffner, C.** (2010). Transmembrane protein 147 (TMEM147) is a novel component of the Nicalin-NOMO protein complex. *J. Biol. Chem.* **285**, 26174-26181. doi:10.1074/jbc.M110.132548
- Doyle, M. T. and Bernstein, H. D.** (2021). BamA forms a translocation channel for polypeptide export across the bacterial outer membrane. *Mol. Cell* **81**, 2000-2012.e3. doi:10.1016/j.molcel.2021.02.023
- Doyle, M. T. and Bernstein, H. D.** (2022). Function of the Omp85 superfamily of outer membrane protein assembly factors and polypeptide transporters. *Annu. Rev. Microbiol.* **76**, 259-279. doi:10.1146/annurev-micro-033021-023719
- Endo, Y., Shimizu, Y., Nishikawa, H., Sawasato, K. and Nishiyama, K. I.** (2022). Interplay between MPlase, YidC, and PMF during Sec-independent insertion of membrane proteins. *Life Sci. Alliance* **5**, e202101162. doi:10.26508/lsa.202101162
- Fry, M. Y., Najdrova, V., Maggiolo, A. O., Saladi, S. M., Dolezal, P. and Clemons, W. M. Jr.** (2022). Structurally derived universal mechanism for the catalytic cycle of the tail-anchored targeting factor Get3. *Nat. Struct. Mol. Biol.* **29**, 820-830. doi:10.1038/s41594-022-00798-4
- Gemmer, M., Chaillet, M. L., Van Loenhout, J., Cuevas Arenas, R., Vismpas, D., Grollers-Mulderij, M., Koh, F. A., Albanese, P., Scheltema, R. A., Howes, S. C. et al.** (2023). Visualization of translation and protein biogenesis at the ER membrane. *Nature* **614**, 160-167. doi:10.1038/s41586-022-05638-5
- Guna, A., Stevens, T. A., Inglis, A. J., Replogle, J. M., Esantsi, T. K., Muthukumar, G., Shaffer, K. C. L., Wang, M. L., Pogson, A. N., Jones, J. J. et al.** (2022). MTCH2 is a mitochondrial outer membrane protein insertase. *Science* **378**, 317-322. doi:10.1126/science.aadd1856
- Guna, A., Volkmar, N., Christianson, J. C. and Hegde, R. S.** (2018). The ER membrane protein complex is a transmembrane domain insertase. *Science* **359**, 470-473. doi:10.1126/science.aao3099
- Güngör, B., Flohr, T., Garg, S. G. and Herrmann, J. M.** (2022). The ER membrane complex (EMC) can functionally replace the Oxa1 insertase in mitochondria. *PLoS Biol.* **20**, e3001380. doi:10.1371/journal.pbio.3001380
- Hohr, A. I. C., Lindau, C., Wirth, C., Qiu, J., Stroud, D. A., Kutik, S., Guiard, B., Hunte, C., Becker, T., Pfanner, N. et al.** (2018). Membrane protein insertion through a mitochondrial beta-barrel gate. *Science* **359**, eaah6834. doi:10.1126/science.aah6834
- Homberg, B., Rehling, P. and Cruz-Zaragoza, L. D.** (2023). The multifaceted mitochondrial OXA insertase. *Trends Cell Biol.* **S0962-8924(23)00020-X**. doi:10.1016/j.tcb.2023.02.001
- Horn, A., Hennig, J., Ahmed, Y. L., Stier, G., Wild, K., Sattler, M. and Sinning, I.** (2015). Structural basis for cpSRP43 chromodomain selectivity and dynamics in Alb3 insertase interaction. *Nat. Commun.* **6**, 8875. doi:10.1038/ncomms9875
- Horten, P., Colina-Tenorio, L. and Rampelt, H.** (2020). Biogenesis of mitochondrial metabolite carriers. *Biomolecules* **10**, 1008. doi:10.3390/biom10071008
- Itoh, Y., Andrell, J., Choi, A., Richter, U., Maiti, P., Best, R. B., Barrientos, A., Battersby, B. J. and Amunts, A.** (2021). Mechanism of membrane-tethered mitochondrial protein synthesis. *Science* **371**, 846-849. doi:10.1126/science.abe0763
- Jaru-Ampornpan, P., Shen, K., Lam, V. Q., Ali, M., Doniach, S., Jia, T. Z. and Shan, S. O.** (2010). ATP-independent reversal of a membrane protein aggregate by a chloroplast SRP subunit. *Nat. Struct. Mol. Biol.* **17**, 696-702. doi:10.1038/nsmb.1836
- Ji, S., Siegel, A., Shan, S. O., Grimm, B. and Wang, P.** (2021). Chloroplast SRP43 autonomously protects chlorophyll biosynthesis proteins against heat shock. *Nat. Plants* **7**, 1420-1432. doi:10.1038/s41477-021-00994-y
- Jia, L., Dienhart, M., Schram, M., Mccauley, M., Hell, K. and Stuart, R. A.** (2003). Yeast Oxa1 interacts with mitochondrial ribosomes: The importance of the C-terminal hydrophilic region of Oxa1. *EMBO J.* **22**, 6438-6447. doi:10.1093/emboj/cdg624
- Jin, Z., Wan, L., Zhang, Y., Li, X., Cao, Y., Liu, H., Fan, S., Cao, D., Wang, Z., Li, X. et al.** (2022). Structure of a TOC-TIC supercomplex spanning two chloroplast envelope membranes. *Cell* **185**, 4788-4800.e13. doi:10.1016/j.cell.2022.10.030
- Jonikas, M. C., Collins, S. R., Denic, V., Oh, E., Quan, E. M., Schmid, V., Weibezahn, J., Schwappach, B., Walter, P., Weissman, J. S. et al.** (2009). Comprehensive characterization of genes required for protein folding in the endoplasmic reticulum. *Science* **323**, 1693-1697. doi:10.1126/science.1167983
- Kedrov, A., Kusters, I., Krasnikov, V. V. and Driessen, A. J.** (2011). A single copy of SecYEG is sufficient for preprotein translocation. *EMBO J.* **30**, 4387-4397. doi:10.1038/emboj.2011.314
- Kiefer, D. and Kuhn, A.** (1999). Hydrophobic forces drive spontaneous membrane insertion of the bacteriophage Pf3 coat protein without topological control. *EMBO J.* **18**, 6299-6306. doi:10.1093/emboj/18.22.6299
- Komar, J., Alvira, S., Schulze, R. J., Martin, R., Lycklama, A. N. J. A., Lee, S. C., Dafforn, T. R., Deckers-Hebestreit, G., Berger, I., Schaffitzel, C. et al.** (2016). Membrane protein insertion and assembly by the bacterial holo-translocon SecYEG-SecDF-YajC-YidC. *Biochem. J.* **473**, 3341-3354. doi:10.1042/BCJ20160545
- Kumazaki, K., Chiba, S., Takemoto, M., Furukawa, A., Nishiyama, K., Sugano, Y., Mori, T., Dohmae, N., Hirata, K., Nakada-Nakura, Y. et al.** (2014). Structural basis of Sec-independent membrane protein insertion by YidC. *Nature* **509**, 516-520. doi:10.1038/nature13167
- Li, Y., Martin, J. R., Aldama, G. A., Fernandez, D. E. and Cline, K.** (2017). Identification of putative substrates of SEC2, a chloroplast inner envelope translocase. *Plant Physiol.* **173**, 2121-2137. doi:10.1104/pp.17.00012
- Ling, Q., Sadali, N. M., Soufi, Z., Zhou, Y., Huang, B., Zeng, Y., Rodriguez-Quepcion, M. and Jarvis, R. P.** (2021). The chloroplast-associated protein degradation pathway controls chloroplast development and fruit ripening in tomato. *Nat Plants* **7**, 655-666. doi:10.1038/s41477-021-00916-y
- Liu, H., Li, A., Rochaix, J. D. and Liu, Z.** (2023). Architecture of chloroplast TOC-TIC translocon supercomplex. *Nature* **615**, 349-357. doi:10.1038/s41586-023-05744-y
- Lorenzi, I., Oeljeklaus, S., Ronsor, C., Bareth, B., Warscheid, B., Rehling, P. and Dennerlein, S.** (2016). Ribosome-associated Mba1 escorts Cox2 from insertion machinery to maturing assembly intermediates. *Mol. Cell Biol.* **36**, 2782-2793. doi:10.1128/MCB.00361-16
- Mariappan, M., Mateja, A., Dobosz, M., Bove, E., Hegde, R. S. and Keenan, R. J.** (2011). The mechanism of membrane-associated steps in tail-anchored protein insertion. *Nature* **477**, 61-66. doi:10.1038/nature10362
- Mcdowell, M. A., Heimes, M., Fiorentino, F., Mehmood, S., Farkas, A., Coy-Vergara, J., Wu, D., Bolla, J. R., Schmid, V., Heinze, R. et al.** (2020). Structural basis of tail-anchored membrane protein biogenesis by the GET insertase complex. *Mol. Cell* **80**, 72-86.e7. doi:10.1016/j.molcel.2020.08.012

- Mcdowell, M. A., Heimes, M. and Sinning, I.** (2021). Structural and molecular mechanisms for membrane protein biogenesis by the Oxa1 superfamily. *Nat. Struct. Mol. Biol.* **28**, 234–239. doi:10.1038/s41594-021-00567-9
- Mcgilvray, P. T., Anghel, S. A., Sundaram, A., Zhong, F., Trnka, M. J., Fuller, J. R., Hu, H., Burlingame, A. L. and Keenan, R. J.** (2020). An ER translocon for multi-pass membrane protein biogenesis. *Elife* **9**, e56889. doi:10.7554/eLife.56889
- Mckenna, M. J., Adams, B. M., Chu, V., Paulo, J. A. and Shao, S.** (2022). ATP13A1 prevents ERAD of folding-competent mislocalized and misoriented proteins. *Mol. Cell* **82**, 4277–4289.e10. doi:10.1016/j.molcel.2022.09.035
- Mckenna, M. J., Sim, S. I., Ordureau, A., Wei, L., Harper, J. W., Shao, S. and Park, E.** (2020). The endoplasmic reticulum P5A-ATPase is a transmembrane helix dislocase. *Science* **369**, eabc5809. doi:10.1126/science.abc5809
- Meisinger, C., Rissler, M., Chacinska, A., Szklarz, L. K., Milenkovic, D., Kozjak, V., Schonfisch, B., Lohaus, C., Meyer, H. E., Yaffe, M. P. et al.** (2004). The mitochondrial morphology protein Mdm10 functions in assembly of the preprotein translocase of the outer membrane. *Dev. Cell* **7**, 61–71. doi:10.1016/j.devcel.2004.06.003
- Mercier, E., Wang, X., Maiti, M., Wintermeyer, R. and Rodnina, M. V.** (2021). Lateral gate dynamics of the bacterial translocon during cotranslational membrane protein insertion. *Proc. Natl. Acad. Sci. USA* **118**, e2100474118. doi:10.1073/pnas.2100474118
- Miller-Vedam, L. E., Brauning, B., Popova, K. D., Schirle Oakdale, N. T., Bonnar, J. L., Prabu, J. R., Boydston, E. A., Sevillano, N., Shurtleff, M. J., Stroud, R. M. et al.** (2020). Structural and mechanistic basis of the EMC-dependent biogenesis of distinct transmembrane clients. *Elife* **9**, e62611. doi:10.7554/eLife.62611
- Miller, J. D., Bernstein, H. D. and Walter, P.** (1994). Interaction of *E. coli* Ffh4.5S ribonucleoprotein and FtsY mimics that of mammalian signal recognition particle and its receptor. *Nature* **367**, 657–659. doi:10.1038/367657a0
- Miller, J. D., Wilhelm, H., Gierasch, L., Gilmore, R. and Walter, P.** (1993). GTP binding and hydrolysis by the signal recognition particle during initiation of protein translocation. *Nature* **366**, 351–354. doi:10.1038/366351a0
- Moller-Hergt, B. V., Carlstrom, A., Stephan, K., Imhof, A. and Ott, M.** (2018). The ribosome receptors Mrx15 and Mba1 jointly organize cotranslational insertion and protein biogenesis in mitochondria. *Mol. Biol. Cell* **29**, 2386–2396. doi:10.1091/mbc.E18-04-0227
- Noiraj, N., Kuszak, A. J., Gumbart, J. C., Lukacik, P., Chang, H., Easley, N. C., Lithgow, T. and Buchanan, S. K.** (2013). Structural insight into the biogenesis of beta-barrel membrane proteins. *Nature* **501**, 385–390. doi:10.1038/nature12521
- O'keefe, S., Zong, G., Duah, K. B., Andrews, L. E., Shi, W. Q. and High, S.** (2021). An alternative pathway for membrane protein biogenesis at the endoplasmic reticulum. *Commun. Biol.* **4**, 828. doi:10.1038/s42003-021-02363-z
- Okreglak, V. and Walter, P.** (2014). The conserved AAA-ATPase Msp1 confers organelle specificity to tail-anchored proteins. *Proc. Natl. Acad. Sci. USA* **111**, 8019–8024. doi:10.1073/pnas.1405755111
- Ott, M., Prestele, M., Bauerschmitt, H., Funes, S., Bonnefoy, N. and Herrmann, J. M.** (2006). Mba1, a membrane-associated ribosome receptor in mitochondria. *EMBO J.* **25**, 1603–1610. doi:10.1038/sj.emboj.7601070
- Papic, D., Krumpe, K., Dukanovic, J., Dimmer, K. S. and Rapoport, D.** (2011). Multispan mitochondrial outer membrane protein Ugo1 follows a unique Mim1-dependent import pathway. *J. Cell Biol.* **194**, 397–405. doi:10.1083/jcb.201102041
- Pfeffer, S., Woellhaf, M. W., Herrmann, J. M. and Forster, F.** (2015). Organization of the mitochondrial translation machinery studied in situ by cryoelectron tomography. *Nat. Commun.* **6**, 6019. doi:10.1038/ncomms7019
- Pleiner, T., Tomaleri, G. P., Januszzyk, K., Inglis, A. J., Hazu, M. and Voorhees, R. M.** (2020). Structural basis for membrane insertion by the human ER membrane protein complex. *Science* **369**, 433–436. doi:10.1126/science.abb5008
- Powis, K., Schrul, B., Tienson, H., Gostimskaya, I., Breker, M., High, S., Schuldiner, M., Jakob, U. and Schwappach, B.** (2013). Get3 is a holdase chaperone and moves to deposition sites for aggregated proteins when membrane targeting is blocked. *J. Cell Sci.* **126**, 473–483. doi:10.1242/jcs.121251
- Rapoport, T. A., Li, L. and Park, E.** (2017). Structural and mechanistic insights into protein translocation. *Annu. Rev. Cell Dev. Biol.* **33**, 369–390. doi:10.1146/annurev-cellbio-100616-060439
- Rathod, M. K., Nellaepalli, S., Ozawa, S. I., Kuroda, H., Kodama, N., Bujaldon, S., Wollman, F. A. and Takahashi, Y.** (2022). Assembly apparatus of light-harvesting complexes: identification of Alb3.1-cpSRP-LHCP complexes in the green alga *Chlamydomonas reinhardtii*. *Plant Cell Physiol.* **63**, 70–81. doi:10.1093/pcp/pcab146
- Sachelar, I., Petriman, N. A., Kudva, R., Kuhn, P., Welte, T., Knapp, B., Drepper, F., Warscheid, B. and Koch, H. G.** (2013). YidC occupies the lateral gate of the SecYEG translocon and is sequentially displaced by a nascent membrane protein. *J. Biol. Chem.* **288**, 16295–16307. doi:10.1074/jbc.M112.446583
- Saracco, S. A. and Fox, T. D.** (2002). Cox18p is required for export of the mitochondrially encoded *Saccharomyces cerevisiae* Cox2p C-tail and interacts with Pnt1p and Mss2p in the inner membrane. *Mol. Biol. Cell* **13**, 1122–1131. doi:10.1091/mbc.01-12-0580
- Schlenstedt, G., Gudmundsson, G. H., Boman, H. G. and Zimmermann, R.** (1990). A large presecretory protein translocates both cotranslationally, using signal recognition particle and ribosome, and post-translationally, without these ribonucleoproteins, when synthesized in the presence of mammalian microsomes. *J. Biol. Chem.* **265**, 13960–13968. doi:10.1016/S0021-9258(18)77442-5
- Schuldiner, M., Metz, J., Schmid, V., Denic, V., Rakwalska, M., Schmitt, H. D., Schwappach, B. and Weissman, J. S.** (2008). The GET complex mediates insertion of tail-anchored proteins into the ER membrane. *Cell* **134**, 634–645. doi:10.1016/j.cell.2008.06.025
- Serek, J., Bauer-Manz, G., Struhalla, G., Van Den Berg, L., Kiefer, D., Dalbey, R. and Kuhn, A.** (2004). *Escherichia coli* YidC is a membrane insertase for Sec-independent proteins. *EMBO J.* **23**, 294–301. doi:10.1038/sj.emboj.7600063
- Smalinskaite, L., Kim, M. K., Lewis, A. J. O., Keenan, R. J. and Hegde, R. S.** (2022). Mechanism of an intramembrane chaperone for multipass membrane proteins. *Nature* **611**, 161–166. doi:10.1038/s41586-022-05336-2
- Stefer, S., Reitz, S., Wang, F., Wild, K., Pang, Y. Y., Schwarz, D., Bomke, J., Hein, C., Lohr, F., Bernhard, F. et al.** (2011). Structural basis for tail-anchored membrane protein biogenesis by the Get3-receptor complex. *Science* **333**, 758–762. doi:10.1126/science.1207125
- Sundaram, A., Yamsek, M., Zhong, F., Hooda, Y., Hegde, R. S. and Keenan, R. J.** (2022). Substrate-driven assembly of a translocon for multipass membrane proteins. *Nature* **611**, 167–172. doi:10.1038/s41586-022-05330-8
- Szyrach, G., Ott, M., Bonnefoy, N., Neupert, W. and Herrmann, J. M.** (2003). Ribosome binding to the Oxa1 complex facilitates cotranslational protein insertion in mitochondria. *EMBO J.* **22**, 6448–6457. doi:10.1093/emboj/cdg623
- Takeda, H., Busto, J. V., Lindau, C., Tsutsumi, A., Tomii, K., Imai, K., Yamamori, Y., Hirokawa, T., Motono, C., Ganesan, I. et al.** (2023). A multipoint guidance mechanism for beta-barrel folding on the SAM complex. *Nat. Struct. Mol. Biol.* **30**, 176–187. doi:10.1038/s41594-022-00897-2
- Takeda, H., Tsutsumi, A., Nishizawa, T., Lindau, C., Busto, J. V., Wenz, L. S., Ellenrieder, L., Imai, K., Straub, S. P., Mossmann, W. et al.** (2021). Mitochondrial sorting and assembly machinery operates by beta-barrel switching. *Nature* **590**, 163–169. doi:10.1038/s41586-020-03113-7
- Tian, S., Wu, Q., Zhou, B., Choi, M. Y., Ding, B., Yang, W. and Dong, M.** (2019). Proteomic analysis identifies membrane proteins dependent on the ER membrane protein complex. *Cell Rep* **28**, 2517–2526.e5. doi:10.1016/j.celrep.2019.08.006
- Tirincsi, A., O'keefe, S., Nguyen, D., Sicking, M., Dudek, J., Forster, F., Jung, M., Hadzibeganovic, D., Helms, V., High, S. et al.** (2022). Proteomics identifies substrates and a novel component in hSnd2-dependent ER protein targeting. *Cells* **11**, 2925. doi:10.3390/cells11182925
- Tomasek, D., Rawson, S., Lee, J., Wzorek, J. S., Harrison, S. C., Li, Z. and Kahne, D.** (2020). Structure of a nascent membrane protein as it folds on the BAM complex. *Nature* **583**, 473–478. doi:10.1038/s41586-020-2370-1
- Ulrich, K., Farkas, A., Chan, O., Katamanin, O., Schwappach, B. and Jakob, U.** (2022). From guide to guard-activation mechanism of the stress-sensing chaperone Get3. *Mol. Cell* **82**, 3226–3238.e7. doi:10.1016/j.molcel.2022.06.015
- Van Den Berg, B., Clemons, W. M., Jr, Collinson, I., Modis, Y., Hartmann, E., Harrison, S. C. and Rapoport, T. A.** (2004). X-ray structure of a protein-conducting channel. *Nature* **427**, 36–44. doi:10.1038/nature02218
- Voorhees, R. M. and Hegde, R. S.** (2016). Toward a structural understanding of cotranslational protein translocation. *Curr. Opin. Cell Biol.* **41**, 91–99. doi:10.1016/j.cob.2016.04.009
- Wang, F., Chan, C., Weir, N. R. and Denic, V.** (2014). The Get1/2 transmembrane complex is an endoplasmic-reticulum membrane protein insertase. *Nature* **512**, 441–444. doi:10.1038/nature13471
- Wang, L., Toutkoushian, H., Belyy, V., Kokontis, C. Y. and Walter, P.** (2022). Conserved structural elements specialize ATAD1 as a membrane protein extraction machine. *Elife* **11**, e73941. doi:10.7554/eLife.73941
- Wenger, C., Harsman, A., Niemann, M., Oeljeklaus, S., Von Kanel, C., Calderaro, S., Warscheid, B. and Schneider, A.** (2023). The Mba1 homologue of *Trypanosoma brucei* is involved in the biogenesis of oxidative phosphorylation complexes. *Mol. Microbiol.* **119**, 537–550. doi:10.1111/mmi.15048
- Wickles, S., Singharoy, A., Andreani, J., Seemayer, S., Bischoff, L., Berninghausen, O., Soeding, J., Schulten, K., Van Der Sluis, E. O. and Beckmann, R.** (2014). A structural model of the active ribosome-bound membrane protein insertase YidC. *Elife* **3**, e03035. doi:10.7554/eLife.03035
- Wild, K., Juareiz, K. D., Soni, K., Shanmuganathan, V., Hendricks, A., Segnitz, B., Beckmann, R. and Sinning, I.** (2019). Reconstitution of the human SRP system and quantitative and systematic analysis of its ribosome interactions. *Nucleic Acids Res.* **47**, 3184–3196. doi:10.1093/nar/gky1324
- Wild, K., Sinning, I. and Cusack, S.** (2001). Crystal structure of an early protein-RNA assembly complex of the signal recognition particle. *Science* **294**, 598–601. doi:10.1126/science.1063839

- Wohlever, M. L., Mateja, A., Mcgilvray, P. T., Day, K. J. and Keenan, R. J.** (2017). Msp1 is a membrane protein dislocase for tail-anchored proteins. *Mol. Cell* **67**, 194-202.e6. doi:10.1016/j.molcel.2017.06.019
- Wu, H. and Hegde, R. S.** (2023). Mechanism of signal-anchor triage during early steps of membrane protein insertion. *Mol. Cell* **83**, 961-973. doi:10.1016/j.molcel.2023.01.018
- Wu, X. and Rapoport, T. A.** (2021). Translocation of proteins through a distorted lipid bilayer. *Trends Cell Biol.* **31**, 473-484. doi:10.1016/j.tcb.2021.01.002
- Zhang, Y., De Laurentis, E., Bohnsack, K. E., Wahlig, M., Ranjan, N., Gruseck, S., Hackert, P., Wolffe, T., Rodnina, M. V., Schwappach, B. et al.** (2021). Ribosome-bound Get4/5 facilitates the capture of tail-anchored proteins by Sgt2 in yeast. *Nat. Commun.* **12**, 782. doi:10.1038/s41467-021-20981-3
